# Supplementary material
Source: MDPI journal article supplement (https://www.mdpi.com/2073-4344/14/3/192)
Supplement: s1 [file s1]

# Influence of Oxide Coating Layers on the Stability of Gold Catalysts for Furfural Oxidative Esterification to Methyl Furoate

Juan Su <sup>1,2</sup>, Nannan Zhan <sup>1</sup>, Yuan Tan <sup>1,\*</sup>, Xiangting Min <sup>2</sup>, Yan Xiao <sup>1,2</sup> and Botao Qiao <sup>2,\*</sup>

<sup>1</sup> Hangzhou Institute of Advanced Studies, Zhejiang Normal University, Hangzhou 311231, China; sujuan@dicp.ac.cn (J.S.); nzhan@zjnu.edu.cn (N.Z.); xiaoyan@dicp.ac.cn (Y.X.)

<sup>2</sup> CAS Key Laboratory of Science and Technology on Applied Catalysis, Dalian Institute of Chemical Physics, Chinese Academy of Sciences, Dalian 116023, China; minxiangting@dicp.ac.cn

\* Correspondence: yuantan2012@zjnu.edu.cn (Y.T.); bqiao@dicp.ac.cn (B.Q.); Tel.: +86-571-82257902 (Y.T.); +86-411-84379416 (B.Q.)

**Table S1.** The crystallite size calculated by the Scherrer equation based on different crystal face.

| Catalyst                  | Crystallite size (nm) |       |
|---------------------------|-----------------------|-------|
|                           | (010)                 | (002) |
| Au/ZA                     | 11.0                  | 17.5  |
| Au@SiO <sub>2</sub> /ZA-1 | 9.6                   | 17.2  |
| Au@SiO <sub>2</sub> /ZA-2 | 10.6                  | 13.2  |
| Au@SiO <sub>2</sub> /ZA-3 | 9.7                   | 14.2  |
| Au@SiO <sub>2</sub> /ZA-4 | 11.4                  | 16.8  |

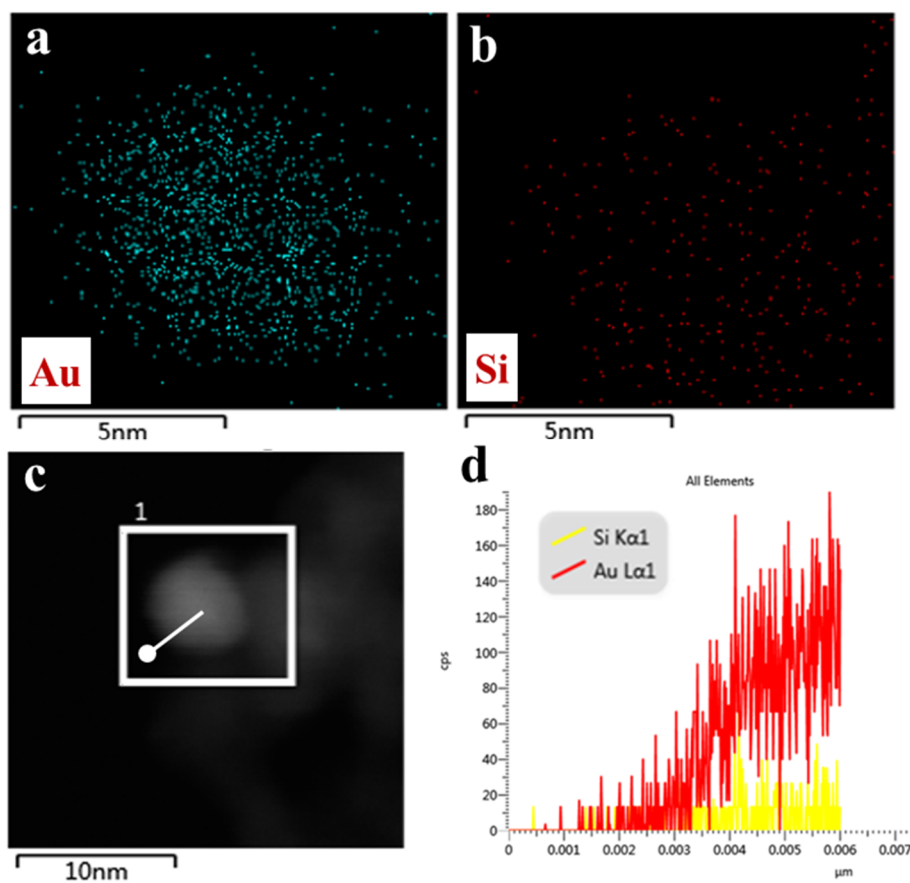

**Figure S1.** EDX-mapping of element distribution of (a) Au and (b) Si, and (c, d) the line analysis of particles in the Au@SiO<sub>2</sub>/ZA-4 catalyst.

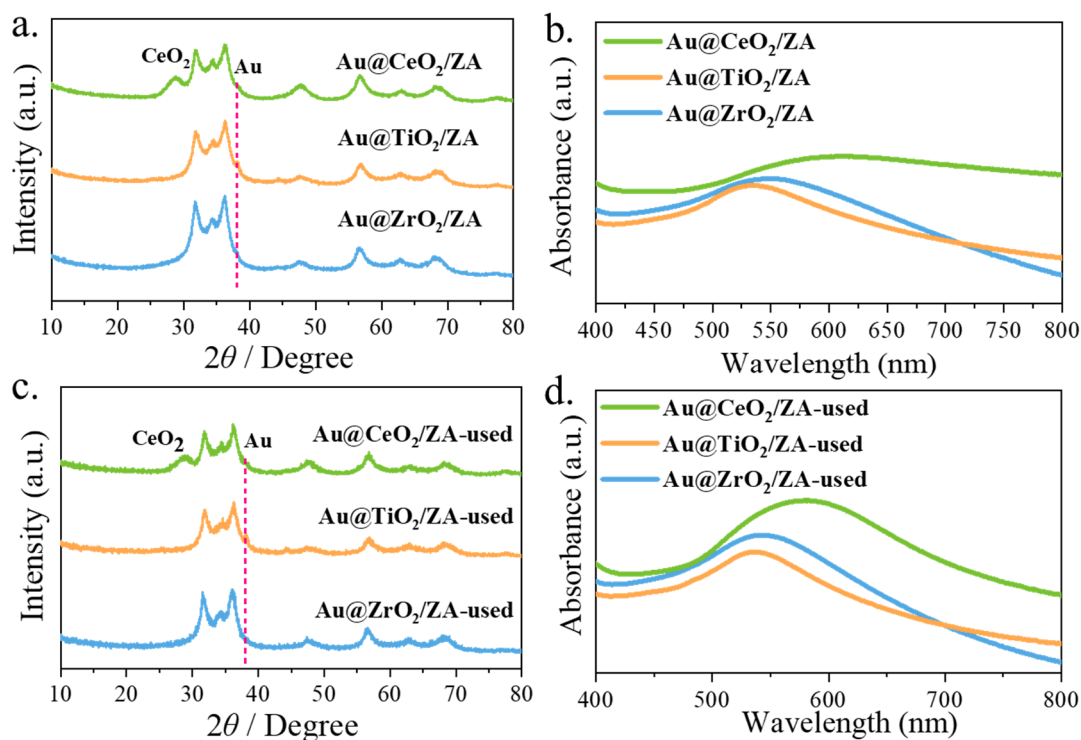

**Figure S2.** (a, c) XRD patterns and (b, d) UV-vis spectra of the (a, b) fresh and (c, d) spent Au@ZrO<sub>2</sub>/ZA; Au@TiO<sub>2</sub>/ZA and Au@CeO<sub>2</sub>/ZA catalysts.

**Table S2.** Characterizations of the supported Au catalysts with different oxides coatings.

| Entry | Catalysts               | Au loadings (%) <sup>a</sup> | M (Zr/Ti/Ce) loadings (%) <sup>a</sup> | S <sub>BET</sub> (m <sup>2</sup> /g) <sup>b</sup> | Total Volume (cm <sup>3</sup> /g) <sup>b</sup> | Pore size (nm) <sup>b</sup> |
|-------|-------------------------|------------------------------|----------------------------------------|---------------------------------------------------|------------------------------------------------|-----------------------------|
| 1     | Au@ZrO <sub>2</sub> /ZA | 1.1                          | 7.5                                    | 68.7                                              | 0.30                                           | 3.7                         |
| 2     | Au@TiO <sub>2</sub> /ZA | 1.0                          | 6.5                                    | 116.8                                             | 0.39                                           | 3.8                         |
| 3     | Au@CeO <sub>2</sub> /ZA | 0.9                          | 8.3                                    | 121.9                                             | 0.31                                           | 3.4                         |

<sup>a</sup> Determined by ICP-OES; <sup>b</sup> Determined by N<sub>2</sub> physical absorption and desorption measurement.
